# Supplementary material for: PVP-capped silver nanoparticles as catalysts for polymerization of alkylsilanes to siloxane composite microspheres
Source: Royal Society of Chemistry journal article supplement (doi:10.1039/b608643h), 2006-01-01
Supplement: b608643h.pdf [file b608643h.pdf]

## **Electronic Supplementary Information**

### **PVP-capped Silver Nanoparticles as Catalysts for Polymerization of**

### **Alkylsilanes to Siloxane Composite Microspheres**

Qunyan Wei, Bin Li, Chao Li, Jiaqiang Wang,\* Wei Wang, and Xiangjun

Yang

*Department of Applied chemistry, Key Laboratory of Medicinal  
Chemistry for Natural Resource, Ministry of Education, Yunnan  
University, Kunming 650091 P. R. China*

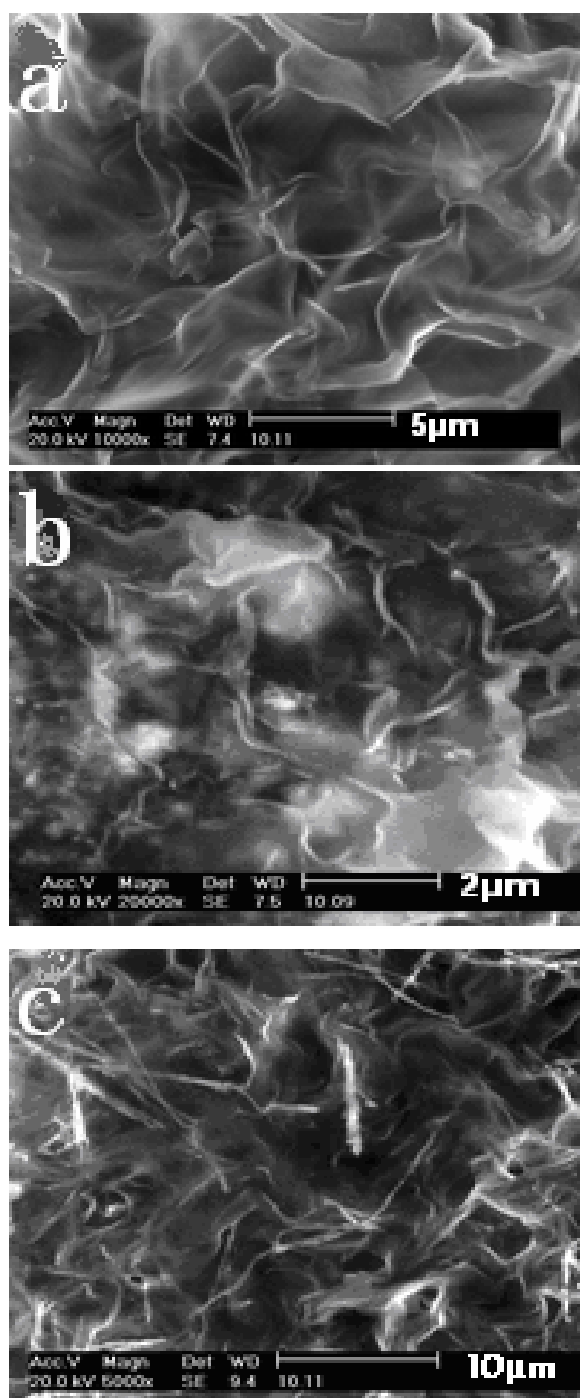

**Figure SI-1** SEM images of the enlarged surface structure of as-prepared microsphere (a, b and c are corresponding to Fig. 2a, b, and c in text, respectively.)

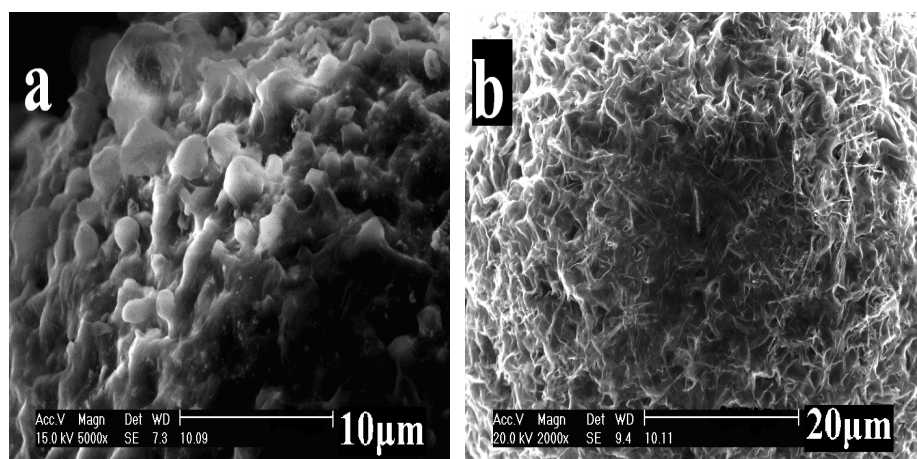

**Figure SI-2** SEM images of the enlarged surface structure of as-prepared microspheres (a and b are corresponding to Fig. 2b and c in text, respectively.) dried on an aluminum plate just a few min. after washed with ethanol.

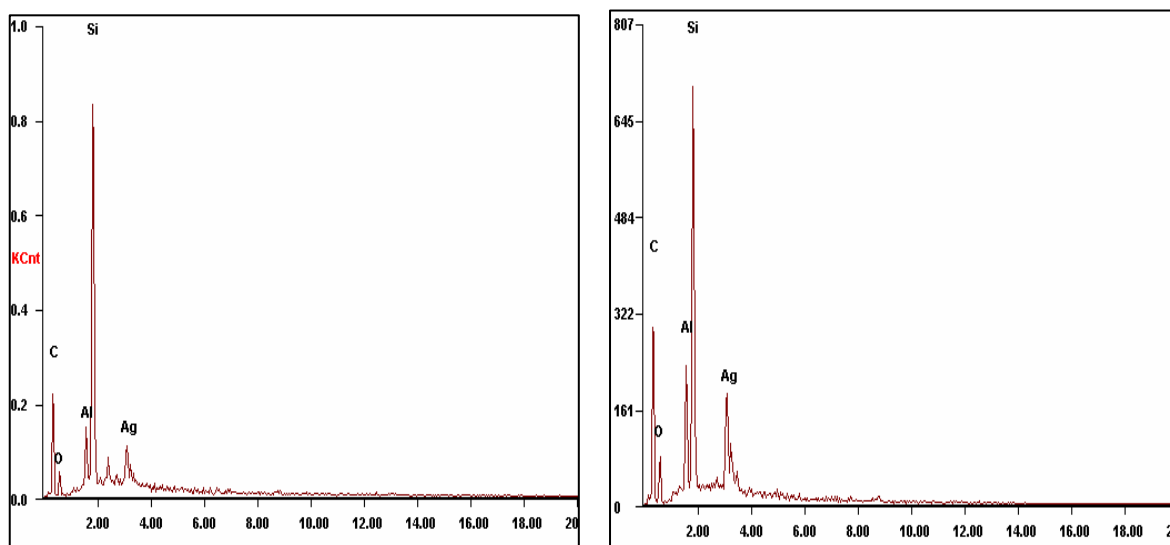

**Figure SI-3** EDAX microanalysis (Phlips XL-30) of composite microsphere

ESCA Survey 29 Dec 05 Area: 1 45 degrees Acq Time: 2.87 min  
File: wanal si,o  
Scale: 1.894 kc/s Offset: 0.384 kc/s Pass E: 93.900 eV Aperture: 4 Mg 200 W

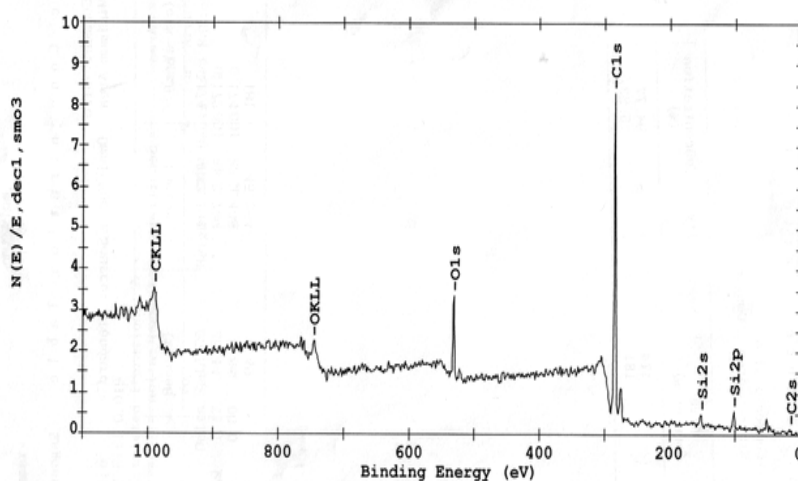

**Figure SI-4.** XPS wide scan spectrum of the composite microsphere  
XPS measurement was performed on a PHI5500ESCA analyzer. The main parameters were as follows: Mg Ka, 200 W, vacuum  $\sim 10^{-7}$  Pa.
